# Supplementary material for: Development of eConsult reflective learning tools for healthcare providers: a pragmatic mixed methods approach
Source: Springer Nature journal article supplement (doi:10.1186/s12875-022-01948-9), 2023-01-16
Supplement: MOESM1 [file 23925710]

**Additional File 1.** Results of the three Delhi rounds for primary care providers' reflective learning tool.

**Round 1**

Seven items including open text boxes for comments

**Tool Content**

- Item 1.** What was your clinical question?
  - Checkboxes and open text box to indicate specialty consulted
- Item 2.** How did the specialist's response to this eConsult impact your knowledge or understanding?
  - Six response options (select all that apply)
- Item 3.** Could this response have been improved?
  - Option yes or no; if yes then 6 response options (select all that apply)
- Item 4.** Will you use this eConsult information for your patient?
  - Option yes, possibly or no
  - If yes, five response options (select all that apply)
  - If possibly, five response options (select all that apply)
  - If no, five response options (select all that apply)
- Item 5.** Do you expect any benefit(s) to the patient as a result of applying this eConsult information?
  - If yes, five response options (select all that apply)
- Item 6.** If you and this patient are willing to share the patient outcomes with the specialist, please click here.
- Item 7.** Are you willing to share a copy of this survey with the specialist?
  - Option yes or no

**Outcomes**

- Item 1.** Consensus reached (76.5%)
- Items 2-7.** Consensus not reached

---

**Round 2**

Six items

**Tool Content**

- Anonymized outcomes report of Round 1 including comments
- Six items (#2-7) not achieving consensus from Round 1

**Outcomes**

- Item 2.** Consensus reached (81.3%)
- Item 3.** Consensus reached (87.5%)
- Items 4-7.** Consensus not reached

---

**Round 3**

Four items

**Tool Content**

- Anonymized outcomes report of Round 2 including comments
- Four items (#4-7) not achieving consensus from Round 2

**Outcomes**

- Item 4.** Consensus not reached. Participants frequently commented that item was too long because they could see all three potential sub-questions. Item was kept in the final version as participants would only see the sub-questions triggered by their response.
- Item 5.** Consensus not reached; but kept item for testing phase given inconsistency in feedback.
- Item 6.** Consensus not reached. However, PCPs commented they would be willing to share this if requested by the specialist. In response, the research team added a similar question to the specialist RLT in the third round.
- Item 7.** Consensus not reached. Conflicting responses by PCPs. Some raised concerns that a working relationship could be damaged if a specialist felt the feedback was negative. Others felt that it was important to provide feedback to specialists. The research team decided to keep the item, making it optional.
