# Supplementary material for: Development of eConsult reflective learning tools for healthcare providers: a pragmatic mixed methods approach
Source: Springer Nature journal article supplement (doi:10.1186/s12875-022-01948-9), 2023-01-16
Supplement: MOESM2 [file 23925710]

**Additional File 2.** Results of the three Delhi rounds for specialists’ reflective learning tool

**Round 1**

Five items including open text boxes for comments

**Tool Content**

- Item 1.** Was the clinical question clear?
  - Option yes or no.
  - If yes, four response options (select all that apply)
  - If no, additional yes or no question
- Item 2.** Did the PCP include sufficient and appropriate information to facilitate your consultation?
  - Option yes or no.
  - If no, six response options (select all that apply)
- Item 3.** Did you use any additional resources to answer the PCP’s question other than personal knowledge/experience?
  - Option yes or no; if yes then 6 response options (select all that apply)
- Item 4.** Did you seek additional information from the referrer?
  - Option yes or no
  - If yes, additional two checklist questions
- Item 5.** Did you learn anything from this eConsult request?
  - Option yes or no
  - If yes, indicate one learning point
  - If no, question ends
- Item 6.** How are you planning to use this information in your practice?
  - Open text field.

**Outcomes**

- Item 1.** Consensus reached (81.75%)
- Item 2.** Consensus reached (93.75%)
- Item 3.** Consensus not reached
- Item 4.** Consensus reached (87.5%)
- Item 5 and 6.** Consensus not reached, combined items for next round.

---

**Round 2**

Two items

**Tool Content**

- Anonymized outcomes report of Round 1 including comments
- Two items (#3 and #5) not achieving consensus from Round 1
- **Item 5.** Did you learn anything from this eConsult request?
  - If yes, then previous Item 6 question “How are you Planning to use this information in your practice?”
  - If no, questions ends

**Outcomes**

- Item 3.** Consensus not reached
- Item 5.** Consensus not reached

---

**Round 3**

Three items

**Tool Content**

- Anonymized outcomes report of Round 2 including comments
- Two items (#3 and #5) not achieving consensus from Round 2
- Question added:
- Item 6.** Would you like the PCP to share the patient outcomes with you?
  - Checkbox option

**Outcomes**

- Item 3.** Consensus not reached
- Item 5.** Consensus not reached
- Item 6.** Consensus not reached
