# Supplementary material for: Development of eConsult reflective learning tools for healthcare providers: a pragmatic mixed methods approach
Source: Springer Nature journal article supplement (doi:10.1186/s12875-022-01948-9), 2023-01-16
Supplement: MOESM4 [file 23925710]

---

**Additional File 4. Specialties or Services consulted by PCPs**

---

| Specialties                                                                    | Champlain<br>BASE | SFHN eReferral | Total |
|--------------------------------------------------------------------------------|-------------------|----------------|-------|
| Internal Medicine Specialties (Cardiology, Endocrinology, Haematology, etc.)   | 15                | 12             | 27    |
| CCM (Complex Care Management)                                                  | 0                 | 3              | 3     |
| Dermatology                                                                    | 7                 | 0              | 7     |
| ENT                                                                            | 0                 | 1              | 2     |
| Neuropsychology                                                                | 0                 | 2              | 2     |
| Surgical Specialties (Neurosurgery, Obstetrics/Gynaecology, Orthopaedics, etc) | 5                 | 11             | 16    |
| Paediatrics                                                                    | 1                 | 0              | 1     |
| Pain                                                                           | 1                 | 0              | 1     |
| Physiatry                                                                      | 0                 | 1              | 1     |
| Radiology                                                                      | 0                 | 2              | 2     |

Note: Not all specialties or services listed here are offered by both eConsult systems.
