# Supplementary material for: Development of eConsult reflective learning tools for healthcare providers: a pragmatic mixed methods approach
Source: Springer Nature journal article supplement (doi:10.1186/s12875-022-01948-9), 2023-01-16

**Additional File 5. Specialist RLT Algorithm**

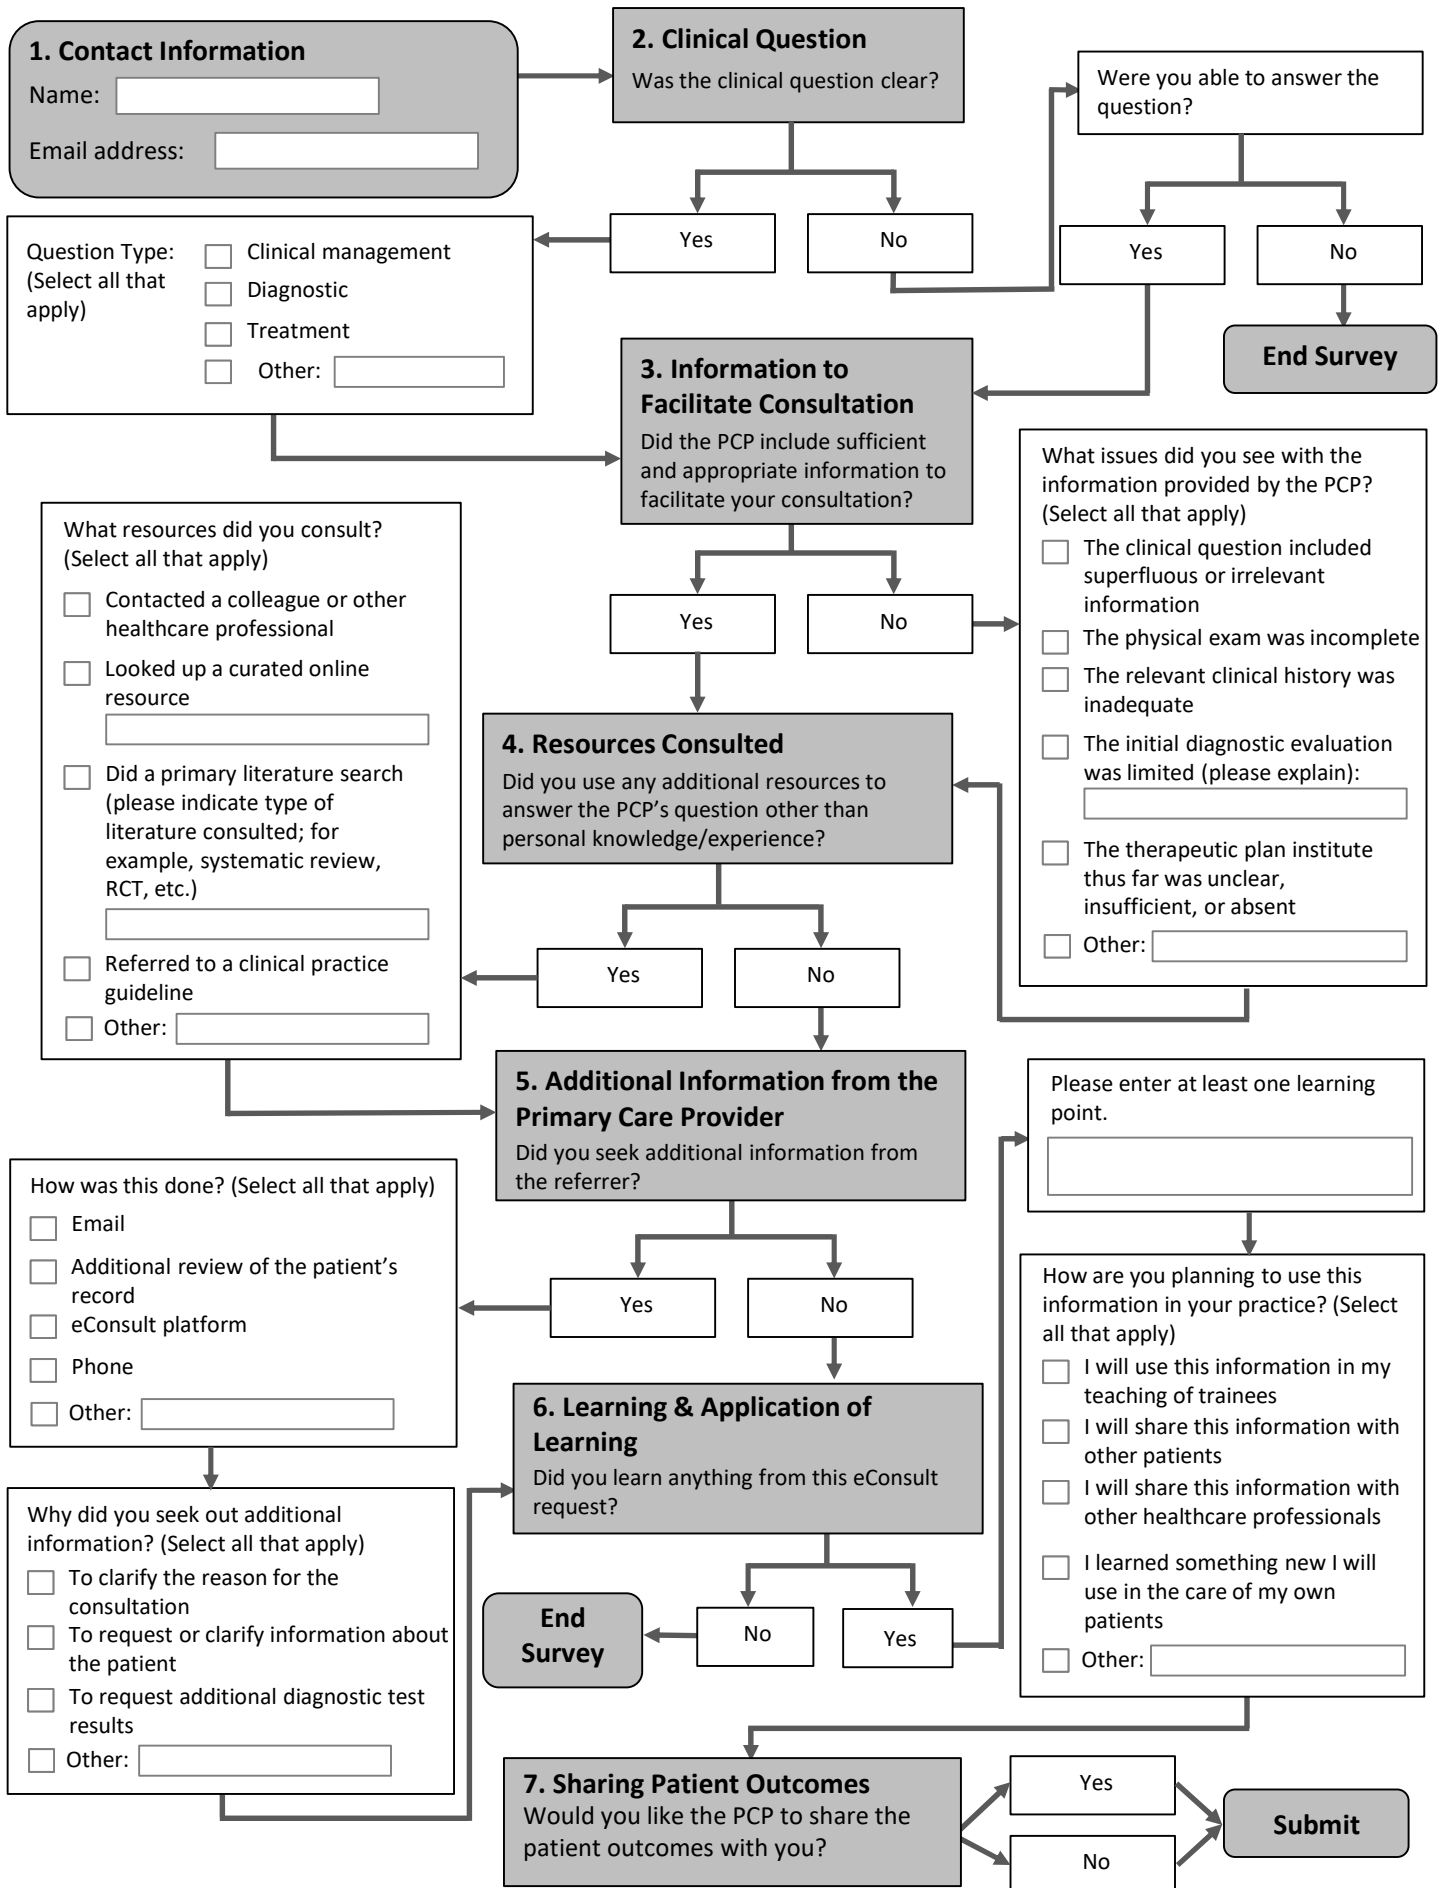

Supplement: MOESM5 [file 23925710]
